# Supplementary figures and images for: HL-60 cells as a valuable model to study LPS-induced neutrophil extracellular traps release
Source: PubMed Central journal article supplement — Heliyon. 2024 Aug 20;10(16):e36386. doi: 10.1016/j.heliyon.2024.e36386 (PMC11388390; doi:10.1016/j.heliyon.2024.e36386), 2024-08-20

# Supplementary Figure 1

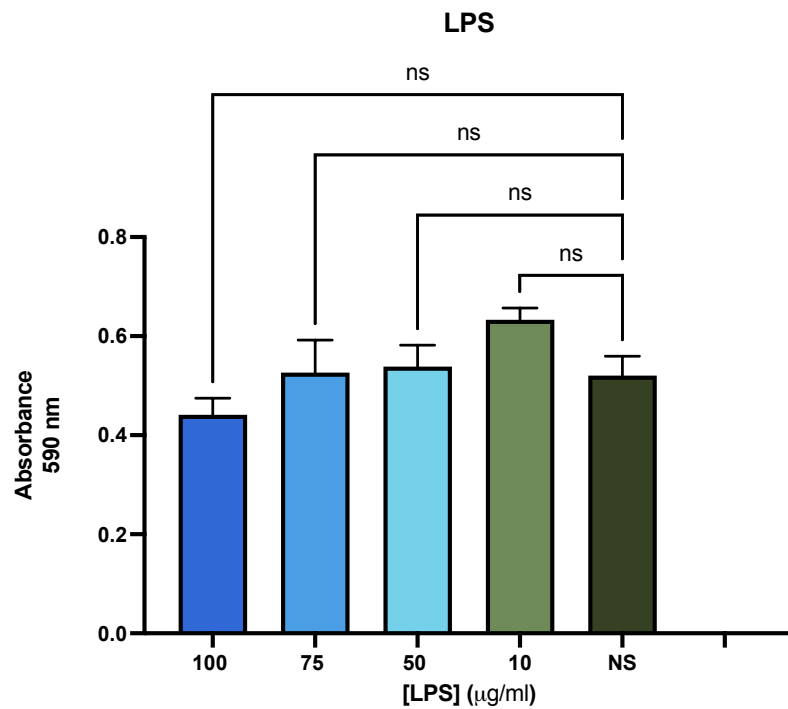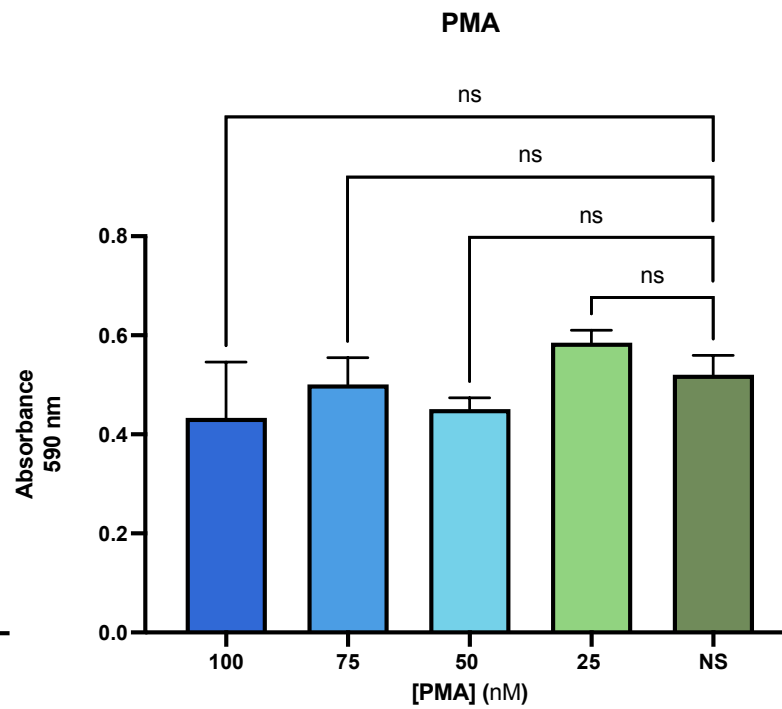

Supplement: mmc1.pdf [file mmc1.pdf]

# Supplementary Figure 2

*P. aeruginosa* LPS

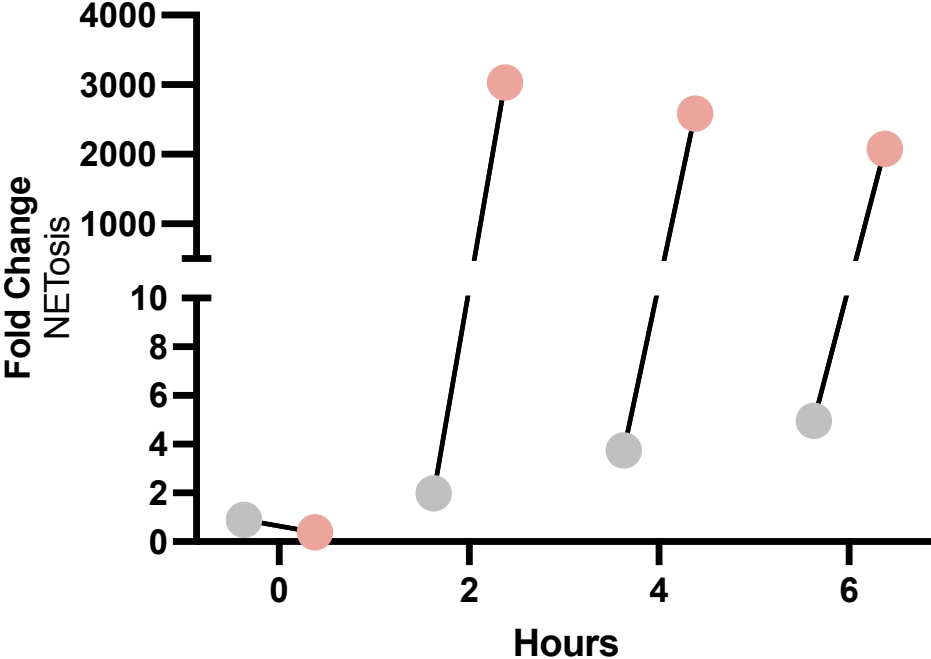

Neutrophils

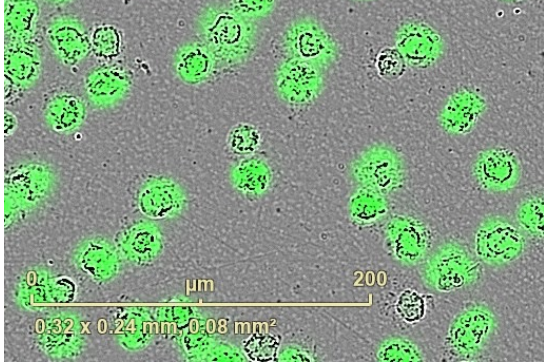

dHL-60

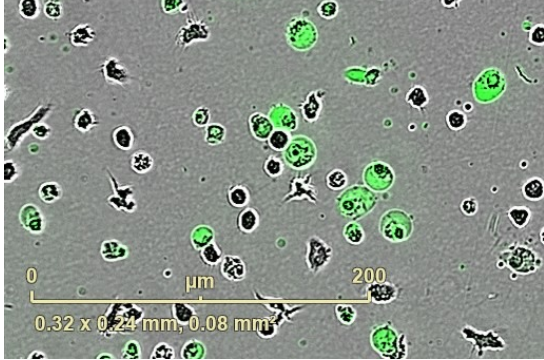

Supplement: mmc2.pdf [file mmc2.pdf]
